# Supplementary material
Source: publisher figshare collection journal article supplement (https://adisjournals.figshare.com/ndownloader/files/38088132)
Supplement: Supplementary file 1 [file 38088132]

# Real-World Analysis Affirms the High Persistence and Adherence Observed With Diroximel Fumarate in Patients With Multiple Sclerosis

Brittney Lager, Jacob Lisen, Ivan Božin, Sarah M. England, Sai L. Shankar, Jason P. Mendoza, James B. Lewin

## Why carry out this study?

*Adherence to disease-modifying therapies is key for achieving optimal outcomes in multiple sclerosis (MS)*

- Diroximel fumarate (DRF) is an oral fumarate approved for relapsing MS
- Similar efficacy and safety to dimethyl fumarate (DMF) but with improved gastrointestinal (GI) tolerability based on clinical trials
- Limited data characterizing persistence/adherence in a real-world setting

## How was this study performed?

- Retrospective analysis of AcariaHealth Specialty Pharmacy Program
- Patients with MS who initiated DRF from December 1, 2019, through January 30, 2021
- Overall population of > 1000 patients
- Subgroup of patients (n = 433) who had switched from DMF to DRF
- Analyzed persistence and adherence

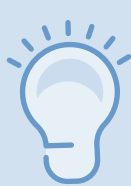

## What was learned from the study?

- In this analysis of > 1000 patients treated with DRF, in the overall population, persistence to DRF at 16 months was high (82.3%), discontinuation due to GI AEs was low (4.5%), and patients were highly adherent to therapy (mean proportion of days covered: 90.8%)
- The findings were consistent in the subgroup of 433 patients who switched from DMF to DRF

## Persistence to DRF was high

Estimated proportion of patients remaining persistent on DRF treatment at 16 months was **82.3%** in the overall population and **90.1%** in the DMF to DRF subgroup

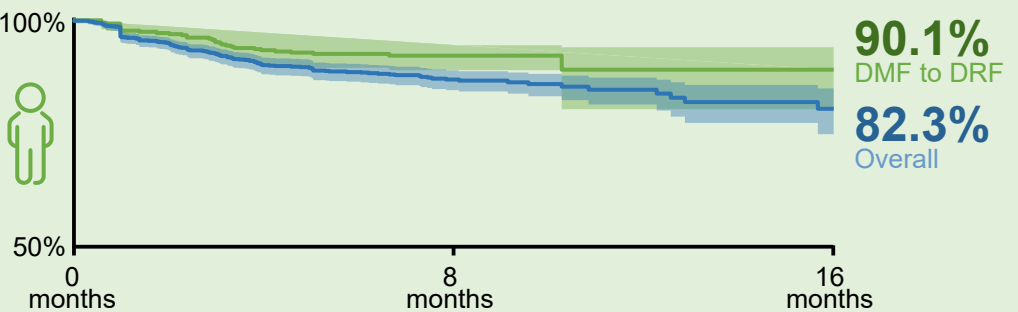

DMF dimethyl fumarate, DRF diroximel fumarate

<sup>a</sup>Persistence was characterized using the Kaplan-Meier method with 95% CIs (95% CI indicated by shaded area).

## Adherence to DRF was high in both the overall and DMF to DRF subgroups

|                                     | Mean PDC | Proportion of patients with PDC ≥ 80% |
|-------------------------------------|----------|---------------------------------------|
| Overall Study Population (n = 1143) | 90.8%    | 85.4%                                 |
| DMF to DRF Subgroup (n = 433)       | 90.7%    | 84.8%                                 |

DMF dimethyl fumarate, DRF diroximel fumarate, PDC proportion of days covered

## Adherence in a subset of patients (n = 18) with lingering GI AEs<sup>a</sup> on DMF increased significantly when they switched to DRF

|                              | Mean PDC | Proportion of patients with PDC ≥ 80% |
|------------------------------|----------|---------------------------------------|
| On DMF treatment (n = 18)    | 71.1%    | 44.4%                                 |
| After switch to DRF (n = 18) | 92.9%    | 94.4%                                 |

AE adverse event, DMF dimethyl fumarate, DRF diroximel fumarate, GI gastrointestinal, PDC proportion of days covered

<sup>a</sup>Lingering GI AEs were defined as those GI AEs resulting in discontinuation of DMF ≥ 1 year after initiating DMF.

The graphical abstract represents the opinions of the authors. For a full list of declarations, including funding and author disclosure statements, and copyright information, please see the full text online.

PEER-REVIEWED  
FEATURE

Adis
